# Supplementary material for: Coupling magnetic and plasmonic anisotropy in hybrid nanorods for mechanochromic responses
Source: PubMed Central journal article supplement (PMC7280256; doi:10.1038/s41467-020-16678-8), 2020-06-08
Supplement: 41467_2020_16678_MOESM2_ESM.pdf [file 41467_2020_16678_MOESM2_ESM.pdf]

**Editorial Note:** This manuscript has been previously reviewed at another journal that is not operating a transparent peer review scheme. The manuscript was considered suitable for publication without further review at *Nature Communications*.
