# Supplementary material for: Coupling magnetic and plasmonic anisotropy in hybrid nanorods for mechanochromic responses
Source: PubMed Central journal article supplement (PMC7280256; doi:10.1038/s41467-020-16678-8), 2020-06-08
Supplement: 41467_2020_16678_MOESM3_ESM.pdf [file 41467_2020_16678_MOESM3_ESM.pdf]

## **Description of Additional Supplementary Files**

File Name: Supplementary Movie 1

Description: Color change in colloidal dispersion of short cAuNRs

File Name: Supplementary Movie 2

Description: Color change in colloidal dispersion of long cAuNRs

File Name: Supplementary Movie 3

Description: Mechanochromic response of plasmonic films to stretching

File Name: Supplementary Movie 4

Description: Mechanochromic response of plasmonic films to linear bending

File Name: Supplementary Movie 5

Description: Mechanochromic response of plasmonic films to nonlinear twisting

File Name: Supplementary Movie 6

Description: Polarization-dependent coloration of plasmonic films

File Name: Supplementary Movie 7

Description: Mechanochromic devices
